# Supplementary material for: Vaccination Hesitancy among Health-Care-Workers in Academic Hospitals Is Associated with a 12-Fold Increase in the Risk of COVID-19 Infection: A Nine-Month Greek Cohort Study
Source: MDPI journal article supplement (doi:10.3390/v14010026), 2021-12-23
Supplement: s1 [file s1]

Supplementary Materials

# Vaccination Hesitancy among Health-Care-Workers in Academic Hospitals Is Associated With a 12-Fold Increase in the Risk of COVID-19-19 Infection: A Nine-Month Greek Cohort Study

**Table S1.** Data with regards to distribution of patients among General (COVID-19, non-COVID-19) and Intensive Care (COVID-19, non-COVID-19) Units during the study period in two Academic Hospitals, Athens Greece, expressed as numbers of patients (patient-days).

| Hospital Admissions/Month | Laiko Hospital<br><i>n</i> = 41,721 (124,025) |                                   | Attikon Hospital<br><i>n</i> = 21,675 (127,573) |                                   | Total<br><i>n</i> = 63,396 (251,598)     |                                    |
|---------------------------|-----------------------------------------------|-----------------------------------|-------------------------------------------------|-----------------------------------|------------------------------------------|------------------------------------|
| January 2021              | non-COVID-19<br><i>n</i> = 4084 (12,812)      | COVID-19<br><i>n</i> = 57 (312)   | non-COVID-19<br><i>n</i> = 2173 (13,679)        | COVID-19<br><i>n</i> = 114 (823)  | non-COVID-19<br><i>n</i> = 6257 (26,491) | COVID-19<br><i>n</i> = 171 (1135)  |
|                           | ICU<br><i>n</i> = 63 (511)                    | ICU<br><i>n</i> = 0 (0)           | ICU<br><i>n</i> = 47 (476)                      | ICU<br><i>n</i> = 17 (235)        | ICU<br><i>n</i> = 110 (987)              | ICU<br><i>n</i> = 17 (235)         |
|                           | non-COVID-19<br><i>n</i> = 4187 (11,521)      | COVID-19<br><i>n</i> = 301 (1158) | non-COVID-19<br><i>n</i> = 2165 (12,280)        | COVID-19<br><i>n</i> = 284 (1770) | non-COVID-19<br><i>n</i> = 6352 (23,801) | COVID-19<br><i>n</i> = 585 (2928)  |
| February 2021             | ICU<br><i>n</i> = 84 (552)                    | ICU<br><i>n</i> = 0 (0)           | ICU<br><i>n</i> = 54 (367)                      | ICU<br><i>n</i> = 49 (416)        | ICU<br><i>n</i> = 138 (919)              | ICU<br><i>n</i> = 49 (416)         |
|                           | non-COVID-19<br><i>n</i> = 4416 (11,153)      | COVID-19<br><i>n</i> = 538 (2362) | non-COVID-19<br><i>n</i> = 1851 (9089)          | COVID-19<br><i>n</i> = 689 (4756) | non-COVID-19<br><i>n</i> = 6267 (20,242) | COVID-19<br><i>n</i> = 1227 (7118) |
|                           | ICU<br><i>n</i> = 91 (637)                    | ICU<br><i>n</i> = 0 (0)           | ICU<br><i>n</i> = 17 (125)                      | ICU<br><i>n</i> = 97 (1150)       | ICU<br><i>n</i> = 108 (762)              | ICU<br><i>n</i> = 97 (1150)        |
| March 2021                | non-COVID-19<br><i>n</i> = 4137 (9986)        | COVID-19<br><i>n</i> = 539 (2876) | non-COVID-19<br><i>n</i> = 1734 (8188)          | COVID-19<br><i>n</i> = 724 (5320) | non-COVID-19<br><i>n</i> = 5871 (18,174) | COVID-19<br><i>n</i> = 1263 (8196) |
|                           | ICU<br><i>n</i> = 83 (602)                    | ICU<br><i>n</i> = 10 (71)         | ICU<br><i>n</i> = 19 (142)                      | ICU<br><i>n</i> = 99 (1146)       | ICU<br><i>n</i> = 102 (744)              | ICU<br><i>n</i> = 102 (744)        |
|                           | non-COVID-19<br><i>n</i> = 4216 (11,261)      | COVID-19<br><i>n</i> = 265 (1507) | non-COVID-19<br><i>n</i> = 1927 (10,611)        | COVID-19<br><i>n</i> = 474 (3761) | non-COVID-19<br><i>n</i> = 6143 (21,872) | COVID-19<br><i>n</i> = 739 (5268)  |
| April 2021                | ICU<br><i>n</i> = 77 (619)                    | ICU<br><i>n</i> = 18 (114)        | ICU<br><i>n</i> = 39 (276)                      | ICU<br><i>n</i> = 69 (931)        | ICU<br><i>n</i> = 116 (895)              | ICU<br><i>n</i> = 87 (1045)        |
|                           | non-COVID-19<br><i>n</i> = 4360 (12,595)      | COVID-19<br><i>n</i> = 123 (687)  | non-COVID-19<br><i>n</i> = 2346 (13,475)        | COVID-19<br><i>n</i> = 170 (856)  | non-COVID-19<br><i>n</i> = 6706 (26,070) | COVID-19<br><i>n</i> = 293 (1543)  |
|                           | ICU<br><i>n</i> = 70 (563)                    | ICU<br><i>n</i> = 0 (0)           | ICU<br><i>n</i> = 53 (368)                      | ICU<br><i>n</i> = 36 (504)        | ICU<br><i>n</i> = 123 (931)              | ICU<br><i>n</i> = 36 (504)         |
| May 2021                  | non-COVID-19<br><i>n</i> = 4820 (13,828)      | COVID-19<br><i>n</i> = 138 (612)  | non-COVID-19<br><i>n</i> = 2382 (13,731)        | COVID-19<br><i>n</i> = 139 (725)  | non-COVID-19<br><i>n</i> = 7202 (27,559) | COVID-19<br><i>n</i> = 277 (1337)  |
|                           | ICU<br><i>n</i> = 68 (515)                    | ICU<br><i>n</i> = 0 (0)           | ICU<br><i>n</i> = 52 (326)                      | ICU<br><i>n</i> = 20 (295)        | ICU<br><i>n</i> = 120 (841)              | ICU<br><i>n</i> = 20 (295)         |
|                           | non-COVID-19<br><i>n</i> = 3851 (11,509)      | COVID-19<br><i>n</i> = 145 (1087) | non-COVID-19<br><i>n</i> = 2003 (11,773)        | COVID-19<br><i>n</i> = 263 (1734) | non-COVID-19<br><i>n</i> = 5854 (23,282) | COVID-19<br><i>n</i> = 408 (2821)  |
| June 2021                 | ICU<br><i>n</i> = 66 (544)                    | ICU<br><i>n</i> = 0 (0)           | ICU<br><i>n</i> = 32 (326)                      | ICU<br><i>n</i> = 32 (364)        | ICU<br><i>n</i> = 98 (870)               | ICU<br><i>n</i> = 32 (364)         |
|                           | non-COVID-19<br><i>n</i> = 4691 (12,803)      | COVID-19<br><i>n</i> = 139 (715)  | non-COVID-19<br><i>n</i> = 1323 (6263)          | COVID-19<br><i>n</i> = 131 (830)  | non-COVID-19<br><i>n</i> = 6014 (19,066) | COVID-19<br><i>n</i> = 270 (1545)  |
|                           | ICU<br><i>n</i> = 76 (477)                    | ICU<br><i>n</i> = 8 (36)          | ICU<br><i>n</i> = 27 (205)                      | ICU<br><i>n</i> = 24 (257)        | ICU<br><i>n</i> = 103 (682)              | ICU<br><i>n</i> = 32 (293)         |
| July 2021                 | non-COVID-19<br><i>n</i> = 4691 (12,803)      | COVID-19<br><i>n</i> = 139 (715)  | non-COVID-19<br><i>n</i> = 1323 (6263)          | COVID-19<br><i>n</i> = 131 (830)  | non-COVID-19<br><i>n</i> = 6014 (19,066) | COVID-19<br><i>n</i> = 270 (1545)  |
|                           | ICU<br><i>n</i> = 76 (477)                    | ICU<br><i>n</i> = 8 (36)          | ICU<br><i>n</i> = 27 (205)                      | ICU<br><i>n</i> = 24 (257)        | ICU<br><i>n</i> = 103 (682)              | ICU<br><i>n</i> = 32 (293)         |
|                           | non-COVID-19<br><i>n</i> = 4691 (12,803)      | COVID-19<br><i>n</i> = 139 (715)  | non-COVID-19<br><i>n</i> = 1323 (6263)          | COVID-19<br><i>n</i> = 131 (830)  | non-COVID-19<br><i>n</i> = 6014 (19,066) | COVID-19<br><i>n</i> = 270 (1545)  |
| August 2021               | ICU<br><i>n</i> = 76 (477)                    | ICU<br><i>n</i> = 8 (36)          | ICU<br><i>n</i> = 27 (205)                      | ICU<br><i>n</i> = 24 (257)        | ICU<br><i>n</i> = 103 (682)              | ICU<br><i>n</i> = 32 (293)         |
|                           | non-COVID-19<br><i>n</i> = 4691 (12,803)      | COVID-19<br><i>n</i> = 139 (715)  | non-COVID-19<br><i>n</i> = 1323 (6263)          | COVID-19<br><i>n</i> = 131 (830)  | non-COVID-19<br><i>n</i> = 6014 (19,066) | COVID-19<br><i>n</i> = 270 (1545)  |
|                           | ICU<br><i>n</i> = 76 (477)                    | ICU<br><i>n</i> = 8 (36)          | ICU<br><i>n</i> = 27 (205)                      | ICU<br><i>n</i> = 24 (257)        | ICU<br><i>n</i> = 103 (682)              | ICU<br><i>n</i> = 32 (293)         |
| September 2021            | non-COVID-19<br><i>n</i> = 4691 (12,803)      | COVID-19<br><i>n</i> = 139 (715)  | non-COVID-19<br><i>n</i> = 1323 (6263)          | COVID-19<br><i>n</i> = 131 (830)  | non-COVID-19<br><i>n</i> = 6014 (19,066) | COVID-19<br><i>n</i> = 270 (1545)  |
|                           | ICU<br><i>n</i> = 76 (477)                    | ICU<br><i>n</i> = 8 (36)          | ICU<br><i>n</i> = 27 (205)                      | ICU<br><i>n</i> = 24 (257)        | ICU<br><i>n</i> = 103 (682)              | ICU<br><i>n</i> = 32 (293)         |
|                           | non-COVID-19<br><i>n</i> = 4691 (12,803)      | COVID-19<br><i>n</i> = 139 (715)  | non-COVID-19<br><i>n</i> = 1323 (6263)          | COVID-19<br><i>n</i> = 131 (830)  | non-COVID-19<br><i>n</i> = 6014 (19,066) | COVID-19<br><i>n</i> = 270 (1545)  |

COVID-19: Coronavirus disease 2019; ICU: Intensive Care Unit.
